# Supplementary material
Source: PubMed Central journal article supplement (PMC4247404)
Supplement: rstb20130268supp1.pdf [file rstb20130268supp1.pdf]

## **ELECTRONIC SUPPLEMENTARY MATERIAL S1**

### **Benthic and fish surveys – Sampling methodology**

Stationary point counts (SPCs) were used at each site to collect detailed data on fish communities (species composition, individual size) and visual estimates of benthic hard-bottom habitat (percent cover of hard coral, crustose coralline algae, turf algae, macroalgae and sand) across depth (0-30 meters). In addition, structural complexity was visually estimated on a scale from 1 (very low) to 5 (very high). In cases where sites were allocated on what turned out to be soft seabed, the survey was not conducted. Site locations were rerandomized before each cruise and always separated by at least 100 m.

A pair of divers simultaneously conducted SPCs in 7.5 m radius cylinders (visually estimated) extending from the substrate to the limits of vertical visibility. One SPC-pair was made of two concurrent and adjacent SPC located along a single 30 m transect line, laid across the substratum with markings at 7.5 m, 15 m and 22.5 m to help the divers locating the mid point and the two edges of their survey plots. If the divers could not see the edge point of their cylinder (i.e. horizontal visibility was  $< 7.5$  m) the survey was cancelled. Otherwise one or two SPC-pairs were conducted per survey, the site data being the average of all of those.

Each count consisted of two phases: first, the divers recorded a list of all species observed during 5 minutes within their cylinder. Then, through rapid visual sweeps of the plots, they recorded number and size (total length to the nearest cm) of all fishes on the list. In cases where a species was observed during the first phase but had left the cylinder when came the tallying phase, divers recorded an estimate of size and number based on the first encounter and marked the data record as “non instantaneous”. However, for rarely encountered or highly mobile species, size and number were noted as soon as first seen in order not to miss opportunity to gather data on them. Divers mostly remained at the centre of the cylinder until the end of the tally part at which time they swam through the plot area, carefully searching for small and cryptic species that would otherwise be underrepresented.

**Identifying multiple coral reef regimes and their drivers across the Hawaiian Archipelago**  
 J.B. Jouffray, M. Nyström, A.V. Norström, I.D. Williams, L.M. Wedding, J.N. Kittinger, G.J. Williams

**ELECTRONIC SUPPLEMENTARY MATERIAL S2**

**Categorisation of fish data**

Trophic level and functional group categorisation of 194 fish species based on their diet and feeding behaviour.

| TROPIC LEVEL<br>FUNCTIONAL GROUP    |                 | DIET                                                                                                                                 |
|-------------------------------------|-----------------|--------------------------------------------------------------------------------------------------------------------------------------|
| Large predators<br>(Apex predators) |                 | Feed mainly on big fishes                                                                                                            |
| Small predators                     |                 | Feed mainly on small fishes and octopus                                                                                              |
| Large invertebrate feeders          |                 | Feed mainly on large invertebrates that have an important impact on ecosystem functioning (e.g. crabs, starfishes, sea urchins, ...) |
| Small invertebrate feeders          |                 | Feed mainly on small benthic invertebrates (e.g. worms, shrimps, gastropods, small crustaceans, ...)                                 |
| Planktivores                        |                 | Feed mainly on plankton/zooplankton                                                                                                  |
| Corallivores                        |                 | Feed mainly on coral polyps                                                                                                          |
| Obligate detritivores               |                 | Feed mainly on decomposing plant and animal parts                                                                                    |
| Herbivores                          | <i>Browsers</i> | Feed on macroalgae                                                                                                                   |
|                                     | <i>Scrapers</i> | Feed mainly on algal turf and remove some part of the reef substratum as they feed                                                   |
|                                     | <i>Grazers</i>  | Feed intensely on filamentous algae without scraping or excavating the reef as they feed                                             |

| Species Code | Taxon Name                       | Family         | Trophic level             |
|--------------|----------------------------------|----------------|---------------------------|
| CHOR         | Chaetodon ornatissimus           | Chaetodontidae | Corallivore               |
| CHME         | Chaetodon meyeri                 | Chaetodontidae | Corallivore               |
| CHLT         | Chaetodon lunulatus              | Chaetodontidae | Corallivore               |
| PLJO         | Plectroglyphidodon johnstonianus | Pomacentridae  | Corallivore               |
| CHQU         | Chaetodon quadrimaculatus        | Chaetodontidae | Corallivore               |
| CHMU         | Chaetodon multicinctus           | Chaetodontidae | Corallivore               |
| CADU         | Cantherhines dumerilii           | Monacanthidae  | Corallivore               |
| EXBR         | Exallias brevis                  | Blenniidae     | Corallivore               |
| CHRE         | Chaetodon reticulatus            | Chaetodontidae | Corallivore               |
| CHUN         | Chaetodon unimaculatus           | Chaetodontidae | Corallivore               |
| ARME         | Arothron meleagris               | Tetraodontidae | Corallivore               |
| PESP         | Pervagor spilosoma               | Monacanthidae  | Corallivore               |
| CHLI         | Chaetodon lineolatus             | Chaetodontidae | Corallivore               |
| CHTR         | Chaetodon trifascialis           | Chaetodontidae | Corallivore               |
| CTST         | Ctenochaetus strigosus           | Acanthuridae   | Detritivore (exclusively) |
| CTHA         | Ctenochaetus hawaiiensis         | Acanthuridae   | Detritivore (exclusively) |
| TRIG         | Balistidae sp                    | Balistidae     | Herbivore (Grazer)        |
| BLEN         | Blenniidae sp                    | Blenniidae     | Herbivore (Grazer)        |
| CISP         | Cirripectes sp                   | Blenniidae     | Herbivore (Grazer)        |
| CIOB         | Cirripectes obscurus             | Blenniidae     | Herbivore (Grazer)        |
| CIVA         | Cirripectes vanderbilti          | Blenniidae     | Herbivore (Grazer)        |

# Identifying multiple coral reef regimes and their drivers across the Hawaiian Archipelago

J.B. Jouffray, M. Nyström, A.V. Norström, I.D. Williams, L.M. Wedding, J.N. Kittinger, G.J. Williams

|      |                                                    |                |                      |
|------|----------------------------------------------------|----------------|----------------------|
| CIVA | <i>Cirripectes vanderbilti</i>                     | Blenniidae     | Herbivore (Grazer)   |
| CAZO | <i>Calotomus zonarchus</i>                         | Scaridae       | Herbivore (Browser)  |
| KYHA | <i>Kyphosus hawaiiensis</i>                        | Kyphosidae     | Herbivore (Browser)  |
| NALI | <i>Naso lituratus</i>                              | Acanthuridae   | Herbivore (Browser)  |
| KYCI | <i>Kyphosus cinerascens</i>                        | Kyphosidae     | Herbivore (Browser)  |
| CACA | <i>Calotomus carolinus</i>                         | Scaridae       | Herbivore (Browser)  |
| KYVA | <i>Kyphosus vaigiensis</i>                         | Kyphosidae     | Herbivore (Browser)  |
| NAUN | <i>Naso unicornis</i>                              | Acanthuridae   | Herbivore (Browser)  |
| CHUB | Kyphosidae sp                                      | Kyphosidae     | Herbivore (Browser)  |
| NASP | <i>Naso sp</i>                                     | Acanthuridae   | Herbivore (Browser)  |
| KYSA | <i>Kyphosus sandwicensis</i>                       | Kyphosidae     | Herbivore (Browser)  |
| MENI | <i>Melichthys niger</i>                            | Balistidae     | Herbivore (Browser)  |
| PLSI | <i>Plectroglyphidodon sindonis</i>                 | Pomacentridae  | Herbivore (Grazer)   |
| CEPO | <i>Centropyge potteri</i>                          | Pomacanthidae  | Herbivore (Grazer)   |
| STFA | <i>Stegastes fasciolatus</i>                       | Pomacentridae  | Herbivore (Grazer)   |
| ZEFL | <i>Zebrasoma flavescens</i>                        | Acanthuridae   | Herbivore (Grazer)   |
| ACNF | <i>Acanthurus nigrofuscus</i>                      | Acanthuridae   | Herbivore (Grazer)   |
| ACNC | <i>Acanthurus nigricans</i>                        | Acanthuridae   | Herbivore (Grazer)   |
| ACNR | <i>Acanthurus nigroris</i>                         | Acanthuridae   | Herbivore (Grazer)   |
| ACLE | <i>Acanthurus leucopareius</i>                     | Acanthuridae   | Herbivore (Grazer)   |
| ACAC | <i>Acanthurus achilles</i>                         | Acanthuridae   | Herbivore (Grazer)   |
| ACAN | <i>Acanthurus achilles</i> X <i>nigricans</i> hybr | Acanthuridae   | Herbivore (Grazer)   |
| ACTR | <i>Acanthurus triostegus</i>                       | Acanthuridae   | Herbivore (Grazer)   |
| ACGU | <i>Acanthurus guttatus</i>                         | Acanthuridae   | Herbivore (Grazer)   |
| ACLI | <i>Acanthurus lineatus</i>                         | Acanthuridae   | Herbivore (Grazer)   |
| ACOL | <i>Acanthurus olivaceus</i>                        | Acanthuridae   | Herbivore (Grazer)   |
| ZEVE | <i>Zebrasoma veliferum</i>                         | Acanthuridae   | Herbivore (Grazer)   |
| ACBL | <i>Acanthurus blochii</i>                          | Acanthuridae   | Herbivore (Grazer)   |
| ACDU | <i>Acanthurus dussumieri</i>                       | Acanthuridae   | Herbivore (Grazer)   |
| ACSP | <i>Acanthurus sp</i>                               | Acanthuridae   | Herbivore (Grazer)   |
| ACXA | <i>Acanthurus xanthopterus</i>                     | Acanthuridae   | Herbivore (Grazer)   |
| SURG | Acanthuridae sp                                    | Acanthuridae   | Herbivore (Grazer)   |
| CHCH | <i>Chanos chanos</i>                               | Chanidae       | Herbivore (Grazer)   |
| CEFI | <i>Centropyge fisheri</i>                          | Pomacanthidae  | Herbivore (Grazer)   |
| CELO | <i>Centropyge lorica</i>                           | Pomacanthidae  | Herbivore (Grazer)   |
| MEVI | <i>Melichthys vidua</i>                            | Balistidae     | Herbivore (Grazer)   |
| SCPS | <i>Scarus psittacus</i>                            | Scaridae       | Herbivore (Scraper)  |
| SCDU | <i>Scarus dubius</i>                               | Scaridae       | Herbivore (Scraper)  |
| CHSO | <i>Chlorurus sordidus</i>                          | Scaridae       | Herbivore (Scraper)  |
| CHPE | <i>Chlorurus perspicillatus</i>                    | Scaridae       | Herbivore (Scraper)  |
| PARR | Scaridae sp                                        | Scaridae       | Herbivore (Scraper)  |
| SCRU | <i>Scarus rubroviolaceus</i>                       | Scaridae       | Herbivore (Scraper)  |
| SCSP | <i>Scarus sp</i>                                   | Scaridae       | Herbivore (Scraper)  |
| CLSP | <i>Chlorurus sp</i>                                | Scaridae       | Herbivore (Scraper)  |
| CASA | <i>Cantherhines sandwichiensis</i>                 | Monacanthidae  | Herbivore (Grazer)   |
| ABSO | <i>Abudefduf sordidus</i>                          | Pomacentridae  | Herbivore (Grazer)   |
| PAMA | <i>Parablennius marmoratus</i>                     | Blenniidae     | Herbivore (Grazer)   |
| ACMA | <i>Acanthurus maculiceps</i>                       | Acanthuridae   | Herbivore (Grazer)   |
| ASSE | <i>Asterropteryx semipunctata</i>                  | Gobiidae       | Herbivore (Grazer)   |
| CEFL | <i>Centropyge flavissima</i>                       | Pomacanthidae  | Herbivore (Grazer)   |
| CEIN | <i>Centropyge interruptus</i>                      | Pomacanthidae  | Herbivore (Grazer)   |
| STNI | <i>Stegastes nigricans</i>                         | Pomacentridae  | Herbivore (Grazer)   |
| STSP | <i>Stegastes sp</i>                                | Pomacentridae  | Herbivore (Grazer)   |
| CASO | <i>Canthigaster solandri</i>                       | Tetraodontidae | Herbivore (Grazer)   |
| GOAT | Mullidae sp                                        | Mullidae       | Large Invert. Feeder |
| OPPU | <i>Oplegnathus punctatus</i>                       | Oplegnathidae  | Large Invert. Feeder |
| INUM | <i>Iniistius umbrilatus</i>                        | Labridae       | Large Invert. Feeder |
| MUMI | <i>Mulloidichthys mimicus</i>                      | Mullidae       | Large Invert. Feeder |
| COBA | <i>Coris ballieui</i>                              | Labridae       | Large Invert. Feeder |
| CAAM | <i>Canthigaster amboinensis</i>                    | Tetraodontidae | Large Invert. Feeder |
| CACO | <i>Canthigaster coronata</i>                       | Tetraodontidae | Large Invert. Feeder |
| THQU | <i>Thalassoma quinquevittatum</i>                  | Labridae       | Large Invert. Feeder |
| COVE | <i>Coris venusta</i>                               | Labridae       | Large Invert. Feeder |
| RHRE | <i>Rhinecanthus rectangulus</i>                    | Balistidae     | Large Invert. Feeder |
| SUBU | <i>Sufflamen bursa</i>                             | Balistidae     | Large Invert. Feeder |

# Identifying multiple coral reef regimes and their drivers across the Hawaiian Archipelago

J.B. Jouffray, M. Nyström, A.V. Norström, I.D. Williams, L.M. Wedding, J.N. Kittinger, G.J. Williams

|      |                                         |                  |                      |
|------|-----------------------------------------|------------------|----------------------|
| SUBU | <i>Sufflamen bursa</i>                  | Balistidae       | Large Invert. Feeder |
| RHAC | <i>Rhinecanthus aculeatus</i>           | Balistidae       | Large Invert. Feeder |
| SUFR | <i>Sufflamen fraenatum</i>              | Balistidae       | Large Invert. Feeder |
| LUKA | <i>Lutjanus kasmira</i>                 | Lutjanidae       | Large Invert. Feeder |
| ARHI | <i>Arothron hispidus</i>                | Tetraodontidae   | Large Invert. Feeder |
| FOFL | <i>Forcipiger flavissimus</i>           | Chaetodontidae   | Large Invert. Feeder |
| THLU | <i>Thalassoma lutescens</i>             | Labridae         | Large Invert. Feeder |
| THCR | <i>Thalassoma duperrey/lutescens</i> hy | Labridae         | Large Invert. Feeder |
| THDU | <i>Thalassoma duperrey</i>              | Labridae         | Large Invert. Feeder |
| CIFA | <i>Cirrhitops fasciatus</i>             | Cirrhitidae      | Large Invert. Feeder |
| PAAR | <i>Paracirrhites arcatus</i>            | Cirrhitidae      | Large Invert. Feeder |
| PSOC | <i>Pseudocheilinus octotaenia</i>       | Labridae         | Large Invert. Feeder |
| OXBI | <i>Oxycheilinus bimaculatus</i>         | Labridae         | Large Invert. Feeder |
| NOTA | <i>Novaculichthys taeniourus</i>        | Labridae         | Large Invert. Feeder |
| CIPI | <i>Cirrhitus pinnulatus</i>             | Cirrhitidae      | Large Invert. Feeder |
| NESA | <i>Neoniphon sammara</i>                | Holocentridae    | Large Invert. Feeder |
| GOVA | <i>Gomphosus varius</i>                 | Labridae         | Large Invert. Feeder |
| THTR | <i>Thalassoma trilobatum</i>            | Labridae         | Large Invert. Feeder |
| PAPL | <i>Parupeneus pleurostigma</i>          | Mullidae         | Large Invert. Feeder |
| SATI | <i>Sargocentron tiere</i>               | Holocentridae    | Large Invert. Feeder |
| PAIN | <i>Parupeneus insularis</i>             | Mullidae         | Large Invert. Feeder |
| PAMU | <i>Parupeneus multifasciatus</i>        | Mullidae         | Large Invert. Feeder |
| DIHO | <i>Diodon holocanthus</i>               | Diodontidae      | Large Invert. Feeder |
| COGA | <i>Coris gaimard</i>                    | Labridae         | Large Invert. Feeder |
| MUFL | <i>Mulloidichthys flavolineatus</i>     | Mullidae         | Large Invert. Feeder |
| THBA | <i>Thalassoma ballieui</i>              | Labridae         | Large Invert. Feeder |
| THPU | <i>Thalassoma purpureum</i>             | Labridae         | Large Invert. Feeder |
| MUPF | <i>Mulloidichthys pfluegeri</i>         | Mullidae         | Large Invert. Feeder |
| PAPU | <i>Parupeneus porphyreus</i>            | Mullidae         | Large Invert. Feeder |
| SASP | <i>Sargocentron spiniferum</i>          | Holocentridae    | Large Invert. Feeder |
| BOBI | <i>Bodianus bilunulatus</i>             | Labridae         | Large Invert. Feeder |
| MOGR | <i>Monotaxis grandoculis</i>            | Lethrinidae      | Large Invert. Feeder |
| BAPO | <i>Balistes polylepis</i>               | Balistidae       | Large Invert. Feeder |
| DIHY | <i>Diodon hystrix</i>                   | Diodontidae      | Large Invert. Feeder |
| GYZE | <i>Gymnomuraena zebra</i>               | Muraenidae       | Large Invert. Feeder |
| AENA | <i>Aetobatus narinari</i>               | Myliobatidae     | Large Invert. Feeder |
| SECO | <i>Sebastapistes coniorata</i>          | Scorpaenidae     | Large Invert. Feeder |
| COFL | <i>Coris flavovittata</i>               | Labridae         | Large Invert. Feeder |
| PSTE | <i>Pseudocheilinus tetrataenia</i>      | Labridae         | Large Invert. Feeder |
| LUFU | <i>Lutjanus fulvus</i>                  | Lutjanidae       | Large Invert. Feeder |
| GYEU | <i>Gymnothorax eurostus</i>             | Muraenidae       | Large Invert. Feeder |
| INPA | <i>Iniiistius pavo</i>                  | Labridae         | Large Invert. Feeder |
| DEBA | <i>Dendrochirus barberi</i>             | Scorpaenidae     | Large Invert. Feeder |
| PRME | <i>Priacanthus meeki</i>                | Priacanthidae    | Large Invert. Feeder |
| CHIN | <i>Cheilio inermis</i>                  | Labridae         | Large Invert. Feeder |
| GOVI | <i>Goniistius vittatus</i>              | Cheilodactylidae | Large Invert. Feeder |
| NESP | <i>Neoniphon sp</i>                     | Holocentridae    | Large Invert. Feeder |
| SACA | <i>Sargocentron caudimaculatum</i>      | Holocentridae    | Large Invert. Feeder |
| THDQ | <i>Thalassoma duperrey/quinquevitta</i> | Labridae         | Large Invert. Feeder |
| THSP | <i>Thalassoma sp</i>                    | Labridae         | Large Invert. Feeder |
| BRMU | <i>Brotula multibarbata</i>             | Ophidiidae       | Large Invert. Feeder |
| OPFA | <i>Oplegnathus fasciatus</i>            | Oplegnathidae    | Large Invert. Feeder |
| POSE | <i>Polydactylus sexfilis</i>            | Polynemidae      | Large Invert. Feeder |
| BIGE | <i>Priacanthus sp</i>                   | Priacanthidae    | Large Invert. Feeder |
| HECR | <i>Heteropriacanthus cruentatus</i>     | Priacanthidae    | Large Invert. Feeder |
| INAN | <i>Iniiistius aneitensis</i>            | Labridae         | Large Invert. Feeder |
| ECNE | <i>Echidna nebulosa</i>                 | Muraenidae       | Large Invert. Feeder |
| TROB | <i>Triaenodon obesus</i>                | Carcharhinidae   | Large Predator       |
| CAAB | <i>Carcharhinus amblyrhynchos</i>       | Carcharhinidae   | Large Predator       |
| CAGA | <i>Carcharhinus galapagensis</i>        | Carcharhinidae   | Large Predator       |
| CAME | <i>Caranx melampygus</i>                | Carangidae       | Large Predator       |
| CAIG | <i>Caranx ignobilis</i>                 | Carangidae       | Large Predator       |
| APVI | <i>Aprion virescens</i>                 | Lutjanidae       | Large Predator       |
| SEDU | <i>Seriola dumerili</i>                 | Carangidae       | Large Predator       |
| CALU | <i>Caranx lugubris</i>                  | Carangidae       | Large Predator       |
| CASP | <i>Caranx sp</i>                        | Carangidae       | Large Predator       |

# Identifying multiple coral reef regimes and their drivers across the Hawaiian Archipelago

J.B. Jouffray, M. Nyström, A.V. Norström, I.D. Williams, L.M. Wedding, J.N. Kittinger, G.J. Williams

|      |                                    |                |             |
|------|------------------------------------|----------------|-------------|
| APSP | Apogon sp                          | Apogonidae     | Planktivore |
| CARD | Apogonidae sp                      | Apogonidae     | Planktivore |
| MYSF | Myripristinae sp                   | Holocentridae  | Planktivore |
| NABR | Naso brevirostris                  | Acanthuridae   | Planktivore |
| NAAN | Naso annulatus                     | Acanthuridae   | Planktivore |
| CHKL | Chaetodon kleinii                  | Chaetodontidae | Planktivore |
| CHAC | Chromis acares                     | Pomacentridae  | Planktivore |
| KUSA | Kuhlia sandvicensis                | Kuhliidae      | Planktivore |
| APKA | Apogon kallopterus                 | Apogonidae     | Planktivore |
| GUCU | Gunnellichthys curiosus            | Microdesmidae  | Planktivore |
| APMA | Apogon maculiferus                 | Apogonidae     | Planktivore |
| MYAM | Myripristis amaena                 | Holocentridae  | Planktivore |
| OXTY | Oxycirrhites typus                 | Cirrhitidae    | Planktivore |
| ABVA | Abudefduf vaigiensis               | Pomacentridae  | Planktivore |
| ABAB | Abudefduf abdominalis              | Pomacentridae  | Planktivore |
| CHLC | Chromis leucura                    | Pomacentridae  | Planktivore |
| SPDE | Spratelloides delicatulus          | Clupeidae      | Planktivore |
| CHHA | Chromis hanui                      | Pomacentridae  | Planktivore |
| NEMA | Nemateleotris magnifica            | Ptereleotridae | Planktivore |
| CIJO | Cirrhilabrus jordani               | Labridae       | Planktivore |
| CHAG | Chromis agilis                     | Pomacentridae  | Planktivore |
| DAAL | Dascyllus albisella                | Pomacentridae  | Planktivore |
| PTHE | Ptereleotris heteroptera           | Ptereleotridae | Planktivore |
| PSBI | Pseudanthias bicolor               | Serranidae     | Planktivore |
| CHVA | Chromis vanderbilti                | Pomacentridae  | Planktivore |
| CHMI | Chaetodon miliaris                 | Chaetodontidae | Planktivore |
| HEPO | Hemitaenichthys polylepis          | Chaetodontidae | Planktivore |
| CHOV | Chromis ovalis                     | Pomacentridae  | Planktivore |
| HEDI | Heniochus diphreutes               | Chaetodontidae | Planktivore |
| HETH | Hemitaenichthys thompsoni          | Chaetodontidae | Planktivore |
| CHVE | Chromis verater                    | Pomacentridae  | Planktivore |
| XAAU | Xanthichthys auromarginatus        | Balistidae     | Planktivore |
| MYKU | Myripristis kuntee                 | Holocentridae  | Planktivore |
| ACTH | Acanthurus thompsoni               | Acanthuridae   | planktivore |
| MYBE | Myripristis berndti                | Holocentridae  | Planktivore |
| DEMA | Decapterus macarellus              | Carangidae     | Planktivore |
| NAHE | Naso hexacanthus                   | Acanthuridae   | Planktivore |
| SNDP | Pinguipedidae sp                   | Pinguipedidae  | Planktivore |
| SECR | Selar crumenophthalmus             | Carangidae     | Planktivore |
| XAME | Xanthichthys mento                 | Balistidae     | Planktivore |
| ENPU | Encrasicholina purpurea            | Engraulidae    | Planktivore |
| MYVI | Myripristis vittata                | Holocentridae  | Planktivore |
| MABI | Manta birostris                    | Myliobatidae   | Planktivore |
| GEPE | Genicanthus personatus             | Pomacanthidae  | Planktivore |
| ANTH | Anthias sp                         | Serranidae     | Planktivore |
| PSHW | Pseudanthias ventralis hawaiiensis | Serranidae     | Planktivore |
| PSTH | Pseudanthias thompsoni             | Serranidae     | Planktivore |
| SOLD | Myripristis sp                     | Holocentridae  | Planktivore |
| NACA | Naso caesius                       | Acanthuridae   | Planktivore |
| NAMA | Naso maculatus                     | Acanthuridae   | Planktivore |

|      |                                 |                |                      |
|------|---------------------------------|----------------|----------------------|
| CATY | Caracanthus typicus             | Caracanthidae  | Small Invert. Feeder |
| SAPP | Sargocentron sp                 | Holocentridae  | Small Invert. Feeder |
| GOBI | Gobiidae sp                     | Gobiidae       | Small Invert. Feeder |
| PUFF | Tetraodontidae sp               | Tetraodontidae | Small Invert. Feeder |
| AMBI | Amblycirrhites bimacula         | Cirrhitidae    | Small Invert. Feeder |
| CAJA | Canthigaster jactator           | Tetraodontidae | Small Invert. Feeder |
| PASC | Parapercis schauinslandii       | Pinguipedidae  | Small Invert. Feeder |
| WRAS | Labridae sp                     | Labridae       | Small Invert. Feeder |
| PSCE | Pseudojuloides cerasinus        | Labridae       | Small Invert. Feeder |
| GYMT | Gymnothorax melatremus          | Muraenidae     | Small Invert. Feeder |
| PLIM | Plectroglyphidodon imparipennis | Pomacentridae  | Small Invert. Feeder |
| CHFR | Chaetodon fremblii              | Chaetodontidae | Small Invert. Feeder |
| FOLO | Forcipiger longirostris         | Chaetodontidae | Small Invert. Feeder |
| MAGE | Macropharyngodon geoffroy       | Labridae       | Small Invert. Feeder |

# Identifying multiple coral reef regimes and their drivers across the Hawaiian Archipelago

J.B. Jouffray, M. Nyström, A.V. Norström, I.D. Williams, L.M. Wedding, J.N. Kittinger, G.J. Williams

|      |                                     |                |                      |
|------|-------------------------------------|----------------|----------------------|
| MAGE | <i>Macropharyngodon geoffroy</i>    | Labridae       | Small Invert. Feeder |
| SADI | <i>Sargocentron diadema</i>         | Holocentridae  | Small Invert. Feeder |
| SAXA | <i>Sargocentron xantherythrum</i>   | Holocentridae  | Small Invert. Feeder |
| APAR | <i>Apolemichthys arcuatus</i>       | Pomacanthidae  | Small Invert. Feeder |
| CHTI | <i>Chaetodon tinker</i>             | Chaetodontidae | Small Invert. Feeder |
| ZACO | <i>Zanclus cornutus</i>             | Zanclidae      | Small Invert. Feeder |
| ANCH | <i>Anampses chrysocephalus</i>      | Labridae       | Small Invert. Feeder |
| CHLU | <i>Chaetodon lunula</i>             | Chaetodontidae | Small Invert. Feeder |
| CHAU | <i>Chaetodon auriga</i>             | Chaetodontidae | Small Invert. Feeder |
| CHEP | <i>Chaetodon ephippium</i>          | Chaetodontidae | Small Invert. Feeder |
| OSME | <i>Ostracion meleagris</i>          | Ostraciidae    | Small Invert. Feeder |
| ANCU | <i>Anampses cuvier</i>              | Labridae       | Small Invert. Feeder |
| ALSC | <i>Aluterus scriptus</i>            | Monacanthidae  | Small Invert. Feeder |
| PEAS | <i>Pervagor aspricaudus</i>         | Monacanthidae  | Small Invert. Feeder |
| PSEV | <i>Pseudocheilinus evanidus</i>     | Labridae       | Small Invert. Feeder |
| HAOR | <i>Halichoeres ornatissimus</i>     | Labridae       | Small Invert. Feeder |
| STBA | <i>Stethojulis balteata</i>         | Labridae       | Small Invert. Feeder |
| SCPA | <i>Scorpaenodes parvipinnis</i>     | Scorpaenidae   | Small Invert. Feeder |
| MABR | <i>Malacanthus brevirostris</i>     | Malacanthidae  | Small Invert. Feeder |
| MUVA | <i>Mulloidichthys vanicolensis</i>  | Mullidae       | Small Invert. Feeder |
| FOBR | <i>Foa brachygramma</i>             | Apogonidae     | Small Invert. Feeder |
| ATIN | <i>Atherinomorus insularum</i>      | Atherinidae    | Small Invert. Feeder |
| CHCI | <i>Chaetodon citrinellus</i>        | Chaetodontidae | Small Invert. Feeder |
| COFU | <i>Coryphopterus</i> sp             | Gobiidae       | Small Invert. Feeder |
| FUDU | <i>Fusigobius duospilus</i>         | Gobiidae       | Small Invert. Feeder |
| PSMA | <i>Psilogobius mainlandi</i>        | Gobiidae       | Small Invert. Feeder |
| SAPU | <i>Sargocentron punctatissimum</i>  | Holocentridae  | Small Invert. Feeder |
| ANSP | <i>Anampses</i> sp                  | Labridae       | Small Invert. Feeder |
| CAVE | <i>Cantherhines verecundus</i>      | Monacanthidae  | Small Invert. Feeder |
| PACH | <i>Parupeneus chrysonemus</i>       | Mullidae       | Small Invert. Feeder |
| LAFO | <i>Lactoria fornasini</i>           | Ostraciidae    | Small Invert. Feeder |
| DOEX | <i>Doryrhamphus excisus excisus</i> | Syngnathidae   | Small Invert. Feeder |
| LAPH | <i>Labroides phthirophagus</i>      | Labridae       | Small Invert. Feeder |
| LIZA | <i>Synodontidae</i> sp              | Synodontidae   | Small Predator       |
| SCPP | <i>Scorpaenopsis</i> sp             | Scorpaenidae   | Small Predator       |
| NEED | <i>Belonidae</i> sp                 | Belonidae      | Small Predator       |
| CONG | <i>Congridae</i> sp                 | Congridae      | Small Predator       |
| GYSP | <i>Gymnothorax</i> sp               | Muraenidae     | Small Predator       |
| GYJA | <i>Gymnothorax javanicus</i>        | Muraenidae     | Small Predator       |
| PAFO | <i>Paracirrhites forsteri</i>       | Cirrhitidae    | Small Predator       |
| SYVA | <i>Synodus variegatus</i>           | Synodontidae   | Small Predator       |
| SCDI | <i>Scorpaenopsis diabolus</i>       | Scorpaenidae   | Small Predator       |
| SAFL | <i>Saurida flamma</i>               | Synodontidae   | Small Predator       |
| OXUN | <i>Oxycheilinus unifasciatus</i>    | Labridae       | Small Predator       |
| PLAR | <i>Platybelone argalus</i>          | Belonidae      | Small Predator       |
| PACY | <i>Parupeneus cyclostomus</i>       | Mullidae       | Small Predator       |
| SCCA | <i>Scorpaenopsis cacopsis</i>       | Scorpaenidae   | Small Predator       |
| CEAR | <i>Cephalopholis argus</i>          | Serranidae     | Small Predator       |
| CAFE | <i>Carangoides ferdau</i>           | Carangidae     | Small Predator       |
| SCLY | <i>Scomberoides lysan</i>           | Carangidae     | Small Predator       |
| CAOR | <i>Carangoides orthogrammus</i>     | Carangidae     | Small Predator       |
| APFU | <i>Aphareus furca</i>               | Lutjanidae     | Small Predator       |
| AUCH | <i>Aulostomus chinensis</i>         | Aulostomidae   | Small Predator       |
| COCI | <i>Conger cinereus</i>              | Congridae      | Small Predator       |
| GYME | <i>Gymnothorax meleagris</i>        | Muraenidae     | Small Predator       |
| ENCA | <i>Enchelynassa canina</i>          | Muraenidae     | Small Predator       |
| GYUN | <i>Gymnothorax undulatus</i>        | Muraenidae     | Small Predator       |
| FICO | <i>Fistularia commersonii</i>       | Fistulariidae  | Small Predator       |
| SPBA | <i>Sphyraena barracuda</i>          | Sphyraenidae   | Small Predator       |
| GYFL | <i>Gymnothorax flavimarginatus</i>  | Muraenidae     | Small Predator       |
| TATR | <i>Taenianotus triacanthus</i>      | Scorpaenidae   | Small Predator       |
| SYBI | <i>Synodus binotatus</i>            | Synodontidae   | Small Predator       |

## Identifying multiple coral reef regimes and their drivers across the Hawaiian Archipelago

J.B. Jouffray, M. Nyström, A.V. Norström, I.D. Williams, L.M. Wedding, J.N. Kittinger, G.J. Williams

|      |                           |               |                |
|------|---------------------------|---------------|----------------|
| TATR | Taenianotus triacanthus   | Scorpaenidae  | Small Predator |
| SYBI | Synodus binotatus         | Synodontidae  | Small Predator |
| PTSP | Pterois sphex             | Scorpaenidae  | Small Predator |
| ANCO | Antennarius commerson     | Antennariidae | Small Predator |
| TYCR | Tylosurus crocodilus      | Belonidae     | Small Predator |
| ELBI | Elagatis bipinnulata      | Carangidae    | Small Predator |
| PSDE | Pseudocaranx dentex       | Carangidae    | Small Predator |
| HALF | Hemiramphidae             | Hemiramphidae | Small Predator |
| MYCH | Myripristis chryseres     | Holocentridae | Small Predator |
| NEAU | Neoniphon aurolineatus    | Holocentridae | Small Predator |
| PROL | Pristilepis oligolepis    | Holocentridae | Small Predator |
| SAEN | Sargocentron ensifer      | Holocentridae | Small Predator |
| CYLE | Cymolutes lecluse         | Labridae      | Small Predator |
| CYPR | Cymolutes praetextatus    | Labridae      | Small Predator |
| EPIN | Epibulus insidiator       | Labridae      | Small Predator |
| ENPA | Enchelycore pardalis      | Muraenidae    | Small Predator |
| GYST | Gymnothorax steindachneri | Muraenidae    | Small Predator |
| MORA | Muraenidae                | Muraenidae    | Small Predator |
| MYMA | Myrichthys magnificus     | Ophichthidae  | Small Predator |
| EUAF | Euthynnus affinis         | Scombridae    | Small Predator |
| KAPE | Katsuwonus pelamis        | Scombridae    | Small Predator |
| SEBA | Sebastapistes ballieui    | Scorpaenidae  | Small Predator |
| SESP | Sebastapistes sp          | Scorpaenidae  | Small Predator |
| EPQU | Epinephelus quernus       | Serranidae    | Small Predator |
| SAGR | Saurida gracilis          | Synodontidae  | Small Predator |
| SYDE | Synodus dermatogenys      | Synodontidae  | Small Predator |
| SYUL | Synodus ulae              | Synodontidae  | Small Predator |

## **ELECTRONIC SUPPLEMENTARY MATERIAL S3**

### **Geospatial human and environmental data**

A set of human-use and environmental variables – human population density, distance to potential impact (e.g. shore, stream), effluent discharge and stream disturbance data – was available for the Main Hawaiian Islands except for Lāna‘i and Ni‘ihau. The shoreline and stream data sets were both provided by the Hawaii State GIS Program and the distance in meters was calculated for each survey location using the Near tool. Human population density was derived from 2010 census blocks from the U.S. Census Bureau and the Hawaii State GIS Program. Values represent the total number of people in a census block. Circular buffers were used at 10 km radius from survey locations and data were included for all polygons that intersected a buffer. Data for Onsite Sewage Disposal Systems (OSDS) were developed by the University of Hawaii at Manoa to assess the health and environment risks posed by OSDS (Whittier and El-kadi 2009). From those, the total effluent in million gallons per day was derived for each survey location. Circular buffers were used at 10 km radius from the survey locations and data were included for all OSDS points that intersected a buffer. Stream disturbance data were assembled as part of the assessment of fish habitats in Hawai‘i for the National Fish Habitat Action Plan (Esselman et al. 2011) and derived for each survey locations. These indexes were standardised from 0 to 1 across catchments and considered at the local scale, which represents stream disturbance at a particular stream rather than within a stream network (network scale). (See Table S3-1 and Table S3-2 below for detailed list of all the variables and indexes used in relation to stream disturbance)

### **References**

- Esselman, P. C., D. M. Infante, L. Wang, D. Wu, A. R. Cooper, and W. W. Taylor, 2011. An index of cumulative disturbance to river fish habitats of the conterminous United States from landscape anthropogenic activities. *Ecological Restoration*, 29:133-151.
- Whittier, R. B., and A. I. El-kadi. 2009. Human and Environmental Risk Ranking of Onsite Sewage Disposal Systems - Final Draft.



## Identifying multiple coral reef regimes and their drivers across the Hawaiian Archipelago

J.B. Jouffray, M. Nyström, A.V. Norström, I.D. Williams, L.M. Wedding, J.N. Kittinger, G.J. Williams

**Table S3-1.** Land cover variables used to create indices of stream disturbance (from the NFHP 2010 Hawaiian stream risk of degradation assessment).

| Variable description                                                    | Units               | Scale                  | Source                                       | Code       |
|-------------------------------------------------------------------------|---------------------|------------------------|----------------------------------------------|------------|
| Total length of utility pipelines                                       | m/km <sup>2</sup>   | 1:24000                | Hawaii Statewide GIS program <sup>b</sup>    | Pipeleng   |
| Total length of tiger 2002 roads (removed paths/trails)                 | m/km <sup>2</sup>   | 1:100000               | Hawaii Statewide GIS program <sup>b</sup>    | Roadleng   |
| Population density                                                      | pop/km <sup>2</sup> | 12 digit Census blocks | NOAA <sup>e</sup>                            | Popdens    |
| Developed, open space                                                   | %                   | 30m                    | NOAA <sup>e</sup>                            | Open       |
| Developed, low intensity                                                | %                   | 30m                    | NOAA <sup>e</sup>                            | Low        |
| Developed, medium intensity                                             | %                   | 30m                    | NOAA <sup>e</sup>                            | Medium     |
| Developed, high intensity                                               | %                   | 30m                    | NOAA <sup>e</sup>                            | High       |
| Percentage of imperviousness                                            | %                   | 30m                    | NOAA <sup>e</sup>                            | Imperv     |
| Dams present on Hawaii streams                                          | #/km <sup>2</sup>   | NA                     | ACE; National Inventory of Dams <sup>a</sup> | Dams       |
| Number of sites from the Superfund National Priorities List             | #/km <sup>2</sup>   | NA                     | EPA <sup>d</sup>                             | Cerclis    |
| Majors from the Permit Compliance System (PCS)                          | #/km <sup>2</sup>   | NA                     | EPA <sup>d</sup>                             | Pcs        |
| Number of sites from the Toxics Release Inventory (TRI) Program         | #/km <sup>2</sup>   | NA                     | EPA <sup>d</sup>                             | Tri        |
| The total number of underground injection wells within a watershed      | #/km <sup>2</sup>   | NA                     | Hawaii DOH                                   | Uic        |
| Quarries located on islands with company name (gems, stones, gravel)    | #/km <sup>2</sup>   | NA                     | Hawaii Statewide GIS program <sup>b</sup>    | Mines      |
| Intersections with tiger 2002 roads (modified to remove paths/trails)   | #/km <sup>2</sup>   | 1:100000               | Hawaii Statewide GIS program <sup>b</sup>    | RoadInter  |
| Intersections with NHD ditches                                          | #/km <sup>2</sup>   | 1:24000                | NHD 24K <sup>c</sup>                         | DitchInter |
| Land that was at one time pineapple or sugarcane plantations (combined) | %                   | 30m                    | Hawaii Statewide GIS program <sup>b</sup>    | FormPlant  |
| Total length of ditches                                                 | m/km <sup>2</sup>   | NA                     | USGS Digital Line graphs, 1983 Version, DAR  | Ditchleng  |
| Pasture/Hay                                                             | %                   | 30m                    | NOAA <sup>e</sup>                            | Pasture    |
| Cultivated Crops                                                        | %                   | 30m                    | NOAA <sup>e</sup>                            | Crops      |

**SOURCES**

<sup>a</sup> <http://www.lrn.usace.army.mil/>

<sup>b</sup> <http://www.state.hi.us/dbedt/gis/>

<sup>c</sup> <http://nhd.usgs.gov/data.html>

<sup>d</sup> <http://epa.gov/>

<sup>e</sup> <http://www.csc.noaa.gov/digitalcoast/data/ccapregiona>

## Identifying multiple coral reef regimes and their drivers across the Hawaiian Archipelago

J.B. Jouffray, M. Nyström, A.V. Norström, I.D. Williams, L.M. Wedding, J.N. Kittinger, G.J. Williams

**Table S3-2.** Indices of stream disturbance made from land cover variables (Table S3-1) and used as predictor variables in the Boosted Regression Trees analysis of the occurrence of multiple benthic regimes in the Hawaiian Archipelago.

| Index                                                                                                                                                                                                                                                                                                                                                                                                                                                                                                                                                                                                                                                                                                               | Code        | Variables included                                                         |
|---------------------------------------------------------------------------------------------------------------------------------------------------------------------------------------------------------------------------------------------------------------------------------------------------------------------------------------------------------------------------------------------------------------------------------------------------------------------------------------------------------------------------------------------------------------------------------------------------------------------------------------------------------------------------------------------------------------------|-------------|----------------------------------------------------------------------------|
| Urban                                                                                                                                                                                                                                                                                                                                                                                                                                                                                                                                                                                                                                                                                                               | UrbanIndex  | Pipeleng<br>Roadleng<br>Popdens<br>Open<br>Low<br>Medium<br>High<br>Imperv |
| A representation of urban disturbance within a catchment. This is a composite variable consisting of eight landscape level urban influences. Using variable weightings created through principle components analysis (PCA), an urban disturbance score was calculated for each catchment and standardized from 0 to 1.                                                                                                                                                                                                                                                                                                                                                                                              |             |                                                                            |
| Point Source                                                                                                                                                                                                                                                                                                                                                                                                                                                                                                                                                                                                                                                                                                        | PointIndex  | Dams<br>Cercdis<br>Pcs<br>Tri<br>Uic<br>Mines                              |
| A representation of the density of sources of point pollution within a catchment. This is a composite variable consisting of six point sources of pollution. Using variable weightings created through principle components analysis (PCA), a single point source pollution score was calculated for each catchment and standardized from 0 to 1.                                                                                                                                                                                                                                                                                                                                                                   |             |                                                                            |
| Fragmentation                                                                                                                                                                                                                                                                                                                                                                                                                                                                                                                                                                                                                                                                                                       | FragIndex   | RoadInter<br>DitchInter                                                    |
| A representation of stream fragmentation, which may indicate migration limitations and disruption of the natural flow regime. The total density of road and ditch intersections were standardized 0 to 1 individually, then summed and standardized 0 to 1 across catchments                                                                                                                                                                                                                                                                                                                                                                                                                                        |             |                                                                            |
| Former Plantation                                                                                                                                                                                                                                                                                                                                                                                                                                                                                                                                                                                                                                                                                                   | FormPlIndex | FormPlant                                                                  |
| A representation of lands that were formerly pineapple or sugarcane plantations and may contribute to disturbance through legacy effects. The total amount of former plantation land cover within a catchment was determined by subtracting the percent current agricultural land from the percent former plantation for all catchments where agricultural land cover decreased by greater than 5%. In catchments where agricultural land decreased by less than 5%, it was assumed that all land formerly used for plantations was still currently being used for agriculture and was therefore not represented by this disturbance variable. This percentage was then standardized from 0 to 1 across catchments. |             |                                                                            |
| Ditch                                                                                                                                                                                                                                                                                                                                                                                                                                                                                                                                                                                                                                                                                                               | DitchIndex  | Ditchleng                                                                  |
| A representation of the relative density of ditch infrastructure. This is a single variable score in which density was standardized 0 to 1 across catchments.                                                                                                                                                                                                                                                                                                                                                                                                                                                                                                                                                       |             |                                                                            |
| Agriculture                                                                                                                                                                                                                                                                                                                                                                                                                                                                                                                                                                                                                                                                                                         | AgrIndex    | Pasture<br>Crops                                                           |
| A representation of agricultural disturbance within a catchment. The total percent of pasture/hay or cultivated crops were summed and then standardized 0 to 1 across catchments.                                                                                                                                                                                                                                                                                                                                                                                                                                                                                                                                   |             |                                                                            |

## **ELECTRONIC SUPPLEMENTARY MATERIAL S4**

### **Boosted Regression Trees methodology**

The categorisation of sites into different regimes was converted to presence-absence of each regime by survey site and analyzed using a binomial distribution. Cross-validation deviance (cv) and standard error (se) were used to estimate model performance, with lower values indicating a better model. To achieve model optimisation, three parameters were adjusted: tree complexity (tc), learning rate (lr) and bag-fraction. The tree complexity determines the number of nodes in a tree, while the learning rate establishes the contribution of each tree to the model, and the bag-fraction specifies the proportion of data to be selected at each step (stochasticity). Optimal values for these parameters were obtained by running in a loop (Richards et al. 2012) all possible combinations of tc (1-2-3-4-5), lr (0.01-0.001-0.005) and bag-fraction (0.5-0.75). The combination with lowest deviance was then selected to fit the final Boosted Regression Trees (BRT). Finally, the *gbm.simplify* routine (3) was used to perform a backward selection that potentially drops variables contributing very little and therefore increases predictive performance. The following variables were found to exert no influence on predicting the occurrence of the different regimes and so were removed from the final BRT models:

#### *Calcifying regime*

**In the MHI:** FormPindex – PoinIndex – DitchIndex – AgrIndex – UrbanIndex

**In the NWHI:** Reef Zones

#### *Turf regime*

**In the MHI:** FormPindex – PoinIndex – Population – DitchIndex – DistCoast – AgrIndex – UrbanIndex

**In the NWHI:** Reef Zones

#### *Macroalgal/sand regime*

**In the MHI:** FormplIndex

**In the NWHI:** Reef Zones

### **Reference**

Richards, B. L., I. D. Williams, O. J. Vetter, and G. J. Williams. 2012. Environmental factors affecting large-bodied coral reef fish assemblages in the Mariana Archipelago. *PloS one* 7:e31374.

**Identifying multiple coral reef regimes and their drivers across the Hawaiian Archipelago**  
 J.B. Jouffray, M. Nyström, A.V. Norström, I.D. Williams, L.M. Wedding, J.N. Kittinger, G.J. Williams

**Table S4-1. Relative influence of human and natural variables on reef regimes:** optimal parameters and predictive performance of the final Boosted Regression Trees models associating three benthic regimes to natural and human variables in the MHI and the NWHI. Cross validation deviance (cv) and standard error (se) were used as measures of model performance (the lower the values the better the model).

| Regime                 | Region | Learning rate | Tree complexity | Bag-fraction | # of trees | Mean total deviance | cv    | se    |
|------------------------|--------|---------------|-----------------|--------------|------------|---------------------|-------|-------|
| <i>Calcifying</i>      | MHI    | 0.001         | 3               | 0.5          | 4050       | 1.113               | 0.737 | 0.095 |
|                        | NWHI   | 0.0005        | 5               | 0.75         | 7950       | 1.23                | 0.612 | 0.05  |
| <i>Turf</i>            | MHI    | 0.001         | 5               | 0.5          | 2950       | 1.37                | 1.121 | 0.087 |
|                        | NWHI   | 0.0005        | 5               | 0.75         | 4400       | 1.337               | 1.099 | 0.077 |
| <i>Macroalgal/sand</i> | MHI    | 0.0005        | 3               | 0.5          | 8200       | 0.974               | 0.645 | 0.048 |
|                        | NWHI   | 0.001         | 4               | 0.5          | 2500       | 1.23                | 0.982 | 0.083 |

**Plots of the fitted values in relation to each of the four most influential predictors for the different regimes:** (a) *calcifying* regime, (b) *turf* regime, (c) *macroalgal/sand* regime. Although the mean values used as our unit of independent replication arrived from a large data collection across the entire archipelago, the mathematical replication was relatively low for a Boosted Regression Trees analysis as a means to identify threshold values. The plots below were used to give examples of preliminary thresholds in cases where we felt adequate replication existed along the covariate axis so as to allow interpretation of a threshold change in the fitted function.

(a)

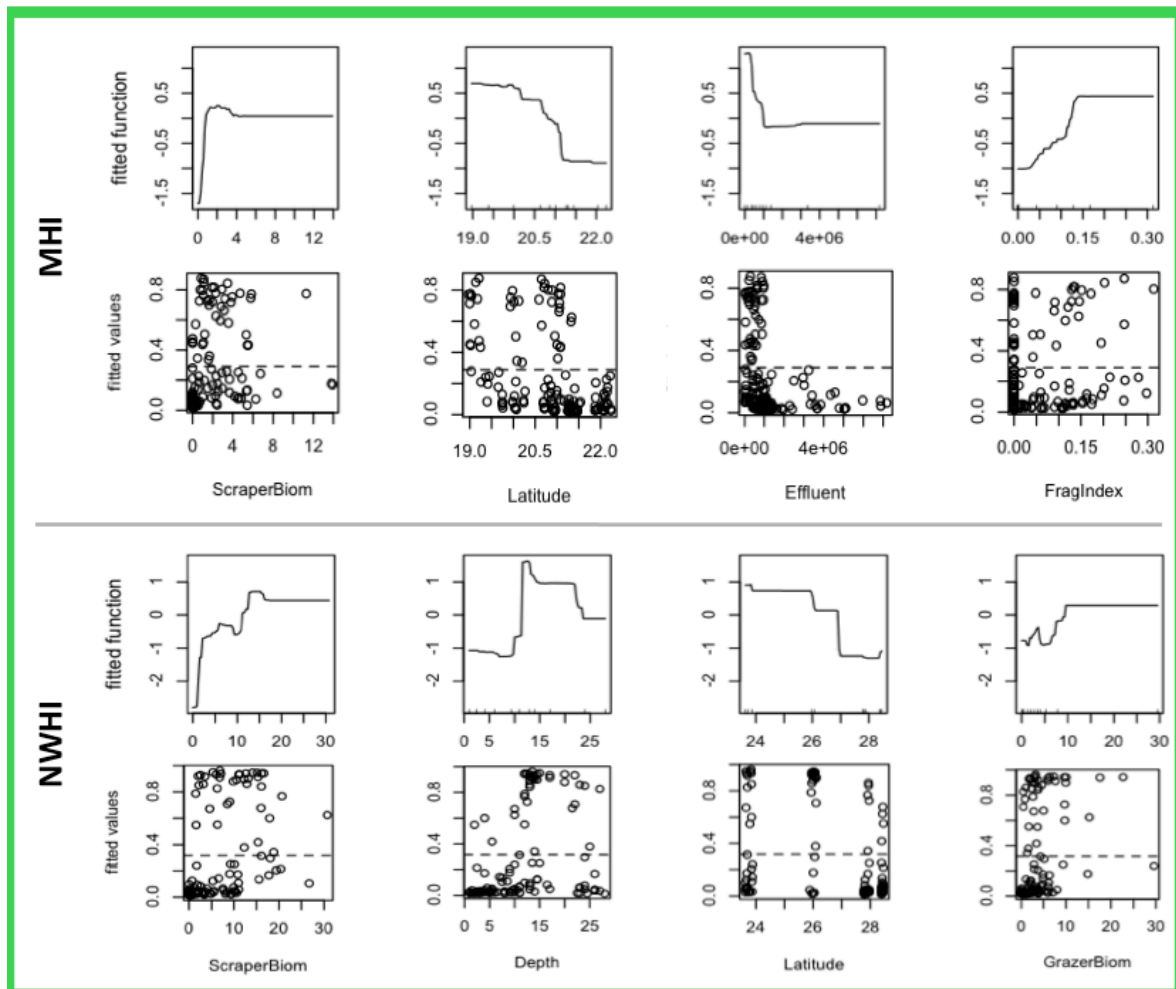

# Identifying multiple coral reef regimes and their drivers across the Hawaiian Archipelago

J.B. Jouffray, M. Nyström, A.V. Norström, I.D. Williams, L.M. Wedding, J.N. Kittinger, G.J. Williams

(b)

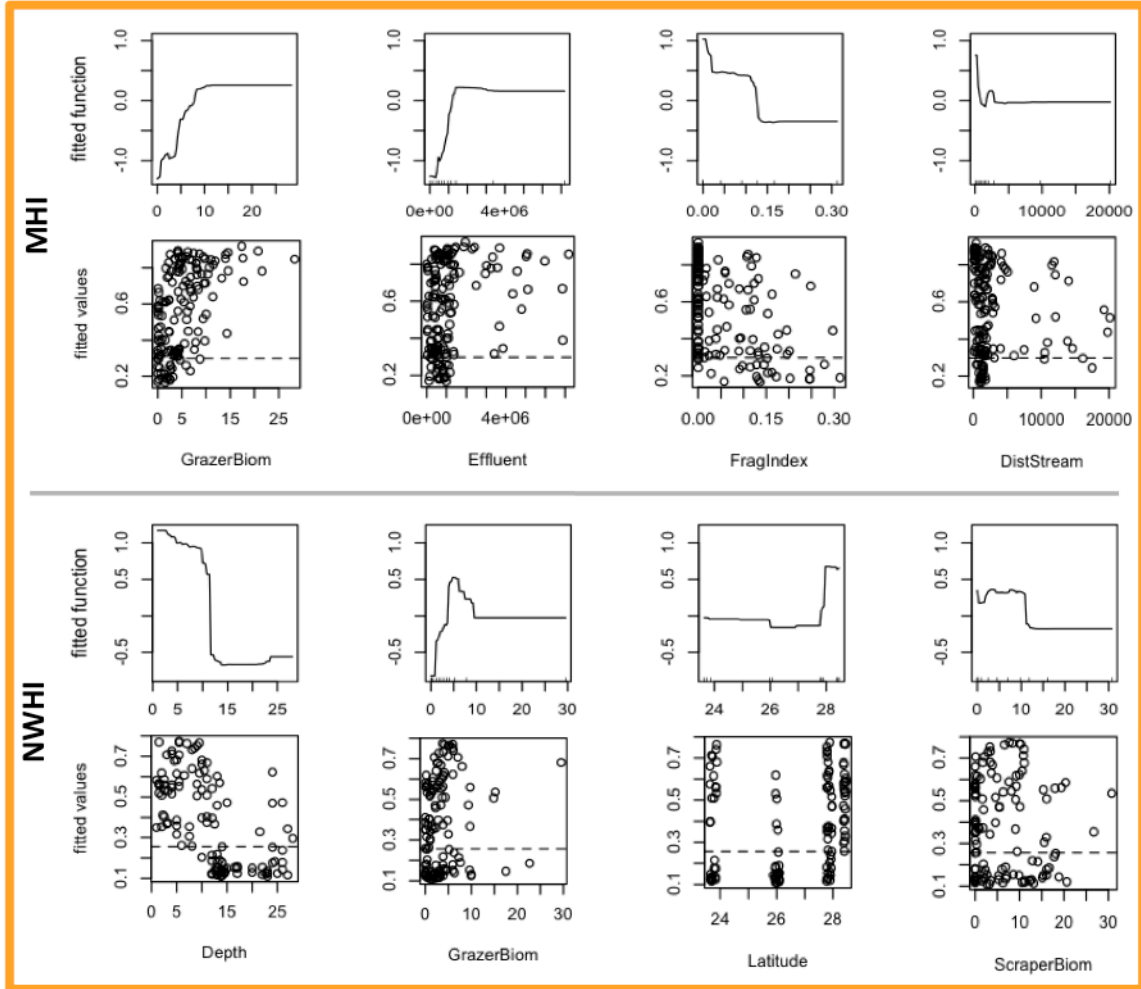

(c)

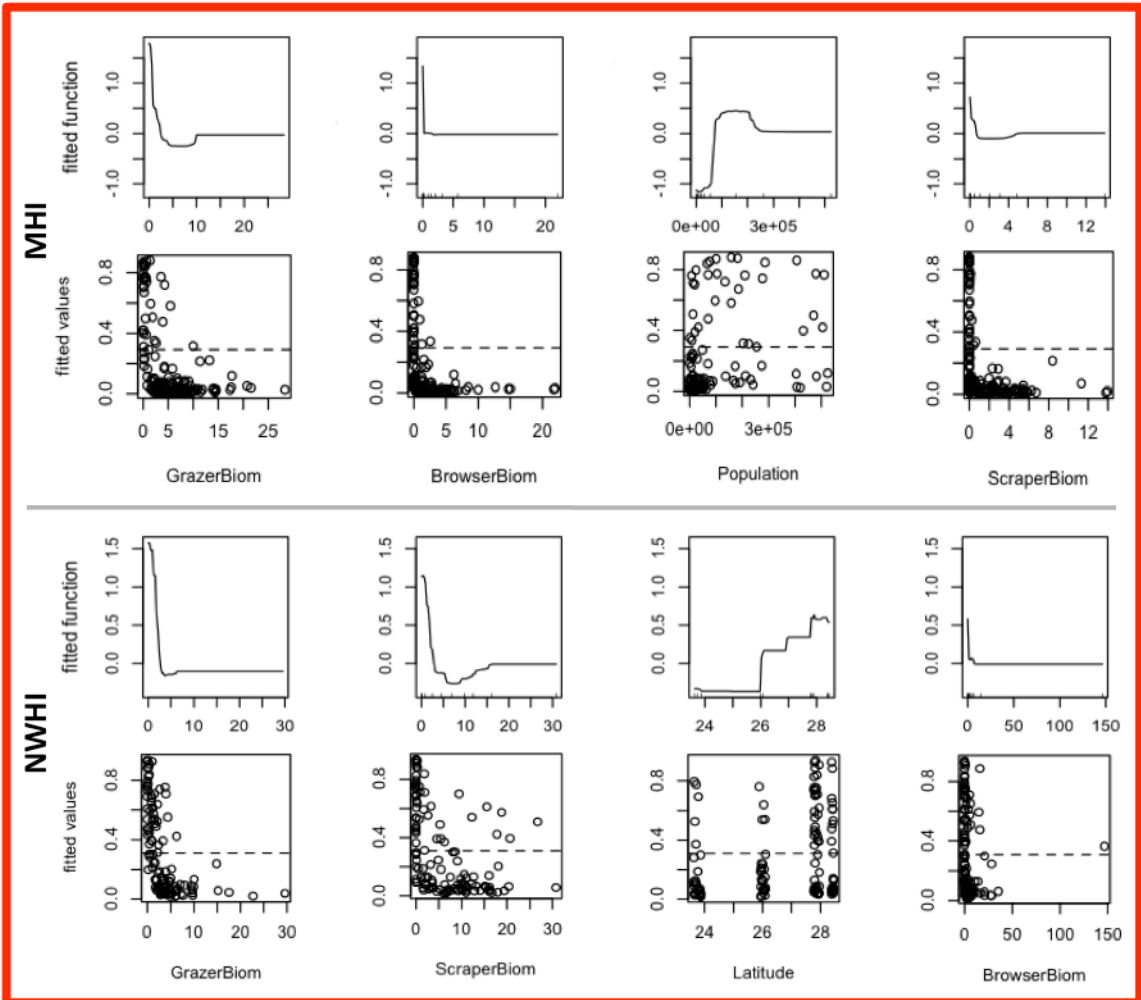

**Identifying multiple coral reef regimes and their drivers across the Hawaiian Archipelago**  
J.B. Jouffray, M. Nyström, A.V. Norström, I.D. Williams, L.M. Wedding, J.N. Kittinger, G.J. Williams

**ELECTRONIC SUPPLEMENTARY MATERIAL S5**

**Categorisation of the sites**

Mapping at an island scale of the 302 sites categorised in three distinct regimes: green squares represent structurally complex hard coral and CCA dominated sites; orange circles correspond to turf algae dominated sites and red triangles represent low complexity macroalgae and sand dominated sites. *MHI*, Main Hawaiian Islands; *NWHI*, North-western Hawaiian Islands. Note that the scales are different between islands.

**Kure Atoll (*NWHI*)**

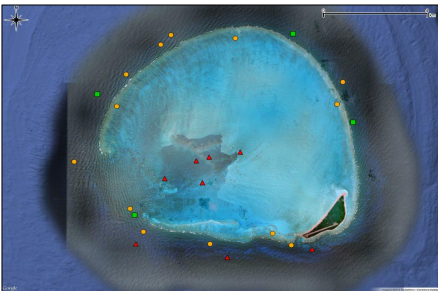

**Pearl & Hermes Atoll (*NWHI*)**

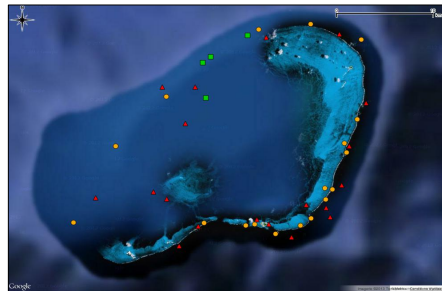

**Lisianski Island (*NWHI*)**

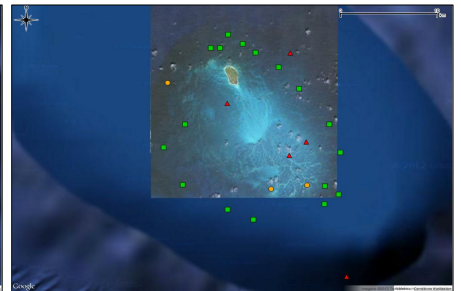

**French Frigate Shoals (*NWHI*)**

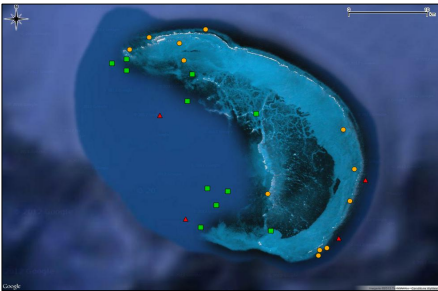

**Ni'ihau (*MHI*)**

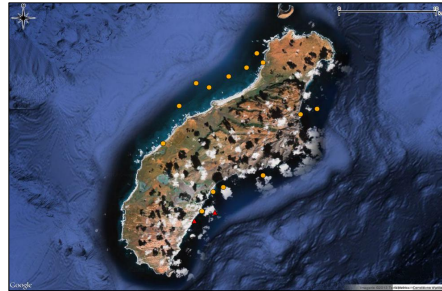

**Kaua'i (*MHI*)**

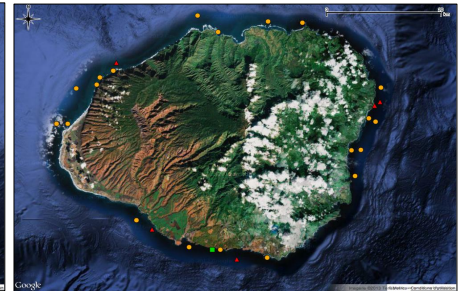

**O'ahu (*MHI*)**

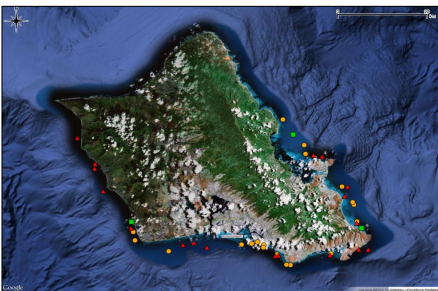

**Moloka'i (*MHI*)**

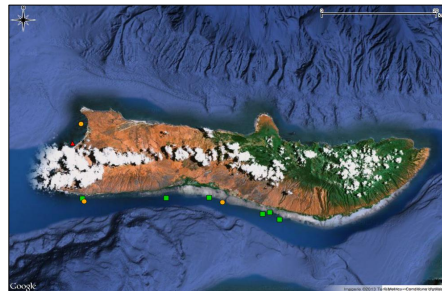

**Lāna'i (*MHI*)**

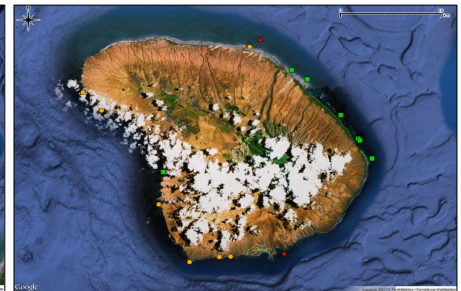

**Maui (*MHI*)**

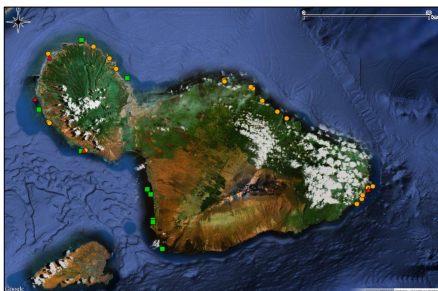

**Hawai'i (*MHI*)**

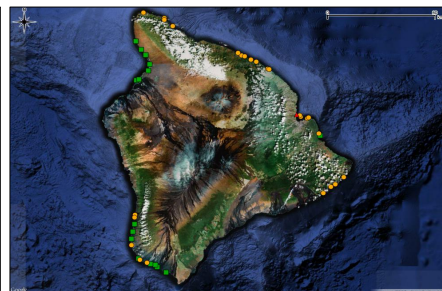

## Identifying multiple coral reef regimes and their drivers across the Hawaiian Archipelago

J.B. Jouffray, M. Nyström, A.V. Norström, I.D. Williams, L.M. Wedding, J.N. Kittinger, G.J. Williams

**Table S5-1.** Average values of the different benthic variables within each of the three regimes: *calcifying* (n=80), *turf* (n=153), and *macroalgal/sand* (n=69).

| Benthic variable             | <i>Calcifying</i> regime | <i>Turf</i> regime | <i>Macroalgal/sand</i> regime |
|------------------------------|--------------------------|--------------------|-------------------------------|
| Complexity (1 to 5)          | 3.0                      | 2.2                | 1.7                           |
| Hard coral (%)               | 42.1                     | 11.1               | 6.8                           |
| Crustose coralline algae (%) | 14.4                     | 4.3                | 3.1                           |
| Turf algae (%)               | 29.1                     | 67.0               | 30.7                          |
| Sand (%)                     | 6.9                      | 8.5                | 21.6                          |
| Macroalgae (%)               | 7.4                      | 8.8                | 38.1                          |
